# Supplementary material for: Social Cognitive Theories and Electronic Health Design: Scoping Review
Source: PubMed Central journal article supplement (PMC6676794; doi:10.2196/11544), 2019-07-19

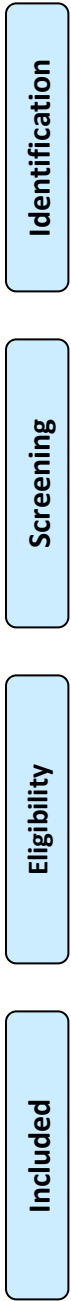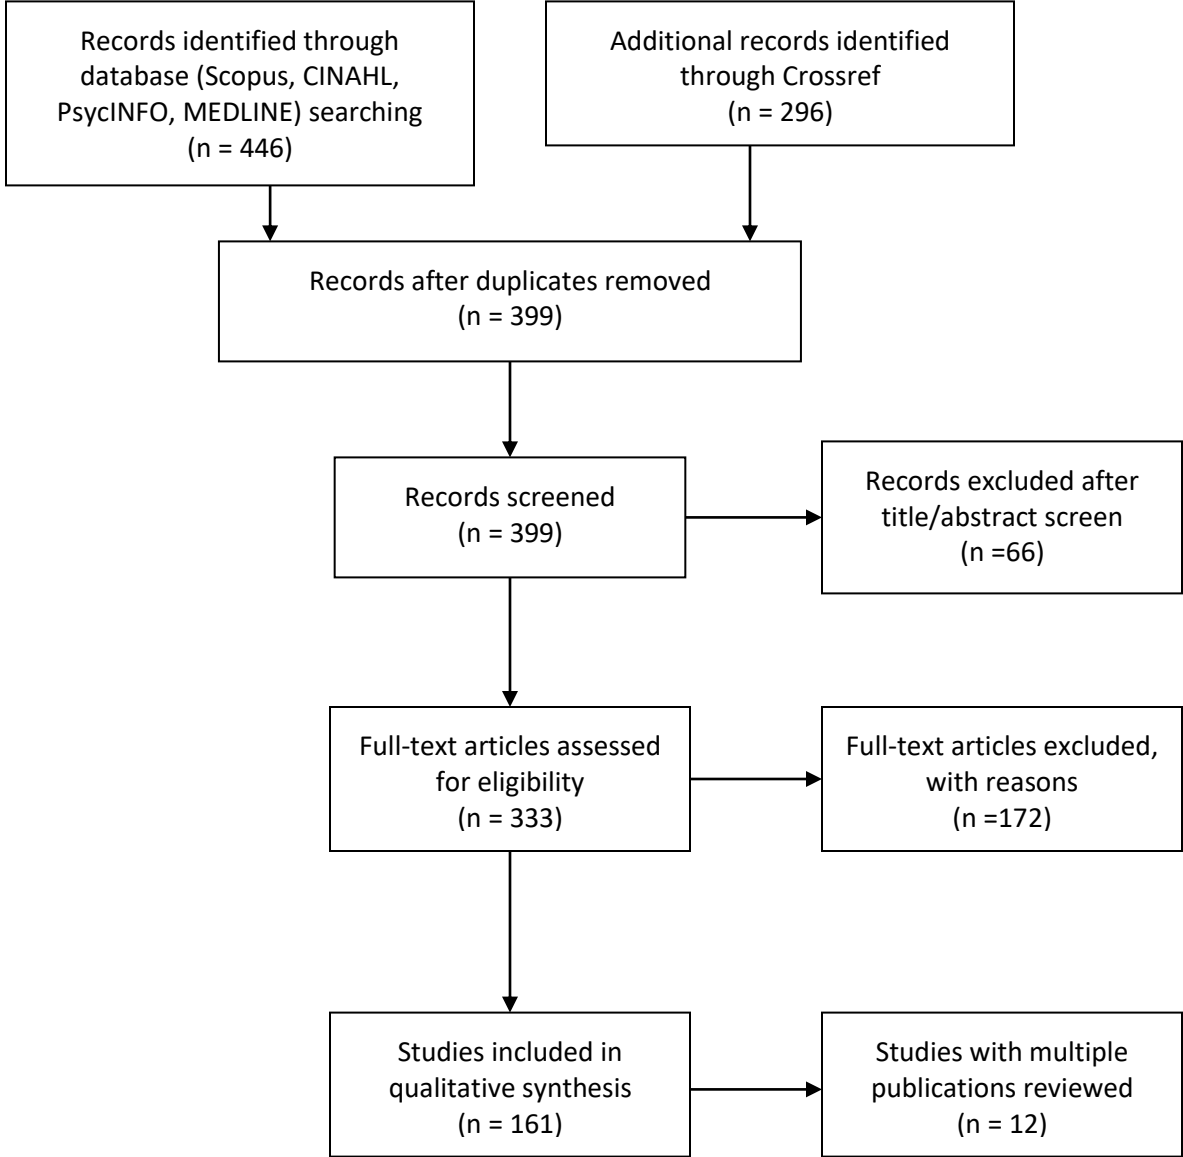

Supplement: humanfactors_v6i3e11544_app1.pdf [file humanfactors_v6i3e11544_app1.pdf]
